# Supplementary material for: Morphometric analysis revealed two different Mediterranean horse mackerel (Trachurus mediterraneus) stocks in the Adriatic Sea
Source: PeerJ. 2025 Jan 21;13:e18765. doi: 10.7717/peerj.18765 (PMC11759607; doi:10.7717/peerj.18765)
Supplement: Table S1 — Correlation coefficients between morphometric characters, before and after the removal of the size effect, are respectively shown below and above the diagonal. Correlation values higher or equal to 0.90 are in bold. [file peerj-13-18765-s001.xlsx]

## Sheet: Foglio1
		X1_8	IW	CW	PW	X1_H	X1_2	X2_3	X3_4	X4_5	X5_6	X6_7	X7_8	X8_9	X9_10	X10_11	X11_12	X12_13	X13_14	X14_15	X15_16	X1_G	C_D	E_F	X14_B	X3_A	X2_15	X2_14	X2_13	X3_14	X3_13	X3_11	X4_13	X4_12	X4_11	X5_11	X5_10	X11_6	X6_9	X7_10	X6_10	X7_9	X2_G	X15_G
	X1_8	1	0	0.01	0	-0.03	-0.01	-0.01	-0.01	0	0	0.01	0.02	0.03	0.01	-0.01	-0.01	-0.01	0	0.01	-0.01	-0.01	-0.02	-0.02	-0.02	-0.01	-0.01	-0.01	0	0	0.02	0.01	0.02	0.01	0.01	0.01	0	0	0.01	0.04	-0.03	0	-0.01	0
	IW	0.88	1	0.25	0.19	0.09	0.09	0.08	-0.07	0.07	-0.11	0.12	-0.16	-0.16	0.04	-0.06	0.1	-0.1	0.07	0.22	0	0.11	0.13	-0.03	-0.09	-0.15	0.19	0.23	0.21	0.24	0.22	0.15	0.21	0.19	0.18	0.21	-0.08	-0.05	0.08	0.02	0.03	0	0.07	0.15
	CW	0.95	0.87	1	0.2	0.02	0.07	0.06	0.12	0.02	-0.01	-0.03	-0.04	-0.02	-0.12	-0.01	0.08	-0.02	0.05	0.09	-0.12	0.02	0.03	0.06	0.05	-0.04	0.05	0.14	0.18	0.46	0.49	0.45	0.56	0.53	0.51	0.54	0.05	0.02	0.01	-0.05	0.12	0.12	0	0.07
	PW	0.93	0.85	0.91	1	0.01	0.06	0	0.02	-0.05	0.01	-0.01	0.03	0.06	-0.07	-0.07	0	0	-0.01	0.07	-0.1	0	-0.03	0.06	-0.01	0.01	0.03	0.07	0.06	0.18	0.2	0.18	0.24	0.23	0.22	0.23	0.06	-0.08	0.03	-0.03	0.08	0.09	0.01	0.04
	X1_H	1	0.89	0.95	0.93	1	0.04	0.27	0.21	-0.04	0.28	0.08	-0.65	-0.64	0.11	0.32	-0.13	0.2	-0.01	0.04	0.23	-0.09	-0.07	0.49	0.24	0.22	0.17	0.33	0.2	0.29	0.11	0.16	0.05	0.06	0.05	0.09	0.28	0.33	0.07	0.17	0.07	0.1	0.04	-0.16
	X1_2	0.92	0.82	0.88	0.86	0.92	1	-0.3	0.03	-0.03	-0.29	-0.22	-0.21	-0.2	-0.26	-0.31	0.02	-0.08	-0.18	0.11	0.25	0.73	0.71	-0.1	0.09	-0.09	0.34	-0.09	-0.38	0.2	-0.09	-0.14	0.03	0	-0.02	-0.01	-0.26	-0.35	-0.22	-0.23	-0.07	0.03	0.41	0.49
	X2_3	0.97	0.87	0.93	0.91	0.98	0.87	1	-0.15	0.15	0.01	-0.03	-0.3	-0.29	-0.01	0.12	-0.04	0.06	0.13	-0.04	0.03	-0.13	-0.14	0.24	0.11	0.07	-0.18	0.17	0.44	0.18	0.07	0.06	0.08	0.1	0.1	0.1	0.01	0.15	-0.02	0.02	0.07	0.02	0.09	-0.16
	X3_4	0.95	0.83	0.92	0.89	0.96	0.88	0.92	1	-0.47	0.05	-0.11	-0.16	-0.17	0.01	0.12	-0.01	0.1	-0.07	-0.16	-0.15	-0.13	-0.06	0.21	0.04	0.35	-0.14	-0.09	-0.07	0.13	0.23	0.3	0.07	0	-0.07	0.08	0.05	0.12	-0.06	-0.02	-0.03	0.05	-0.08	-0.18
	X4_5	0.7	0.64	0.68	0.65	0.7	0.63	0.71	0.57	1	-0.08	0.08	-0.12	-0.07	0	-0.13	0.16	-0.09	0.04	-0.01	0.1	0.02	-0.01	-0.05	0.09	0.01	0.08	0.04	0.11	0.07	0.09	0.12	0.12	0.19	0.26	0	-0.05	-0.16	0.04	0.02	0.06	-0.02	0.06	0.04
	X5_6	0.99	0.87	0.94	0.92	0.99	0.89	0.96	0.95	0.68	1	-0.03	-0.32	-0.3	0.16	0.52	-0.14	0.14	-0.25	-0.15	-0.23	-0.54	-0.44	0.19	-0.03	0.05	-0.07	0.04	-0.12	0.13	0.08	0.13	0.13	0.17	0.18	0.22	0.95	0.57	0.01	0.12	-0.04	0.08	-0.44	-0.37
	X6_7	0.85	0.78	0.8	0.79	0.85	0.73	0.82	0.79	0.62	0.84	1	-0.2	-0.14	0.67	0	-0.02	-0.01	0.07	-0.04	-0.12	-0.28	-0.27	-0.01	-0.13	-0.1	-0.01	0.01	0.07	0	0.06	0.04	0.01	0.01	0.03	0	0.06	-0.09	0.8	0.64	0.08	-0.01	-0.28	-0.14
	X7_8	0.76	0.62	0.71	0.72	0.72	0.64	0.7	0.69	0.46	0.71	0.56	1	0.93	-0.16	-0.32	0.04	-0.1	-0.03	-0.06	-0.19	-0.08	-0.06	-0.31	-0.17	-0.09	-0.17	-0.23	-0.2	-0.27	-0.13	-0.15	-0.05	-0.05	-0.04	-0.02	-0.34	-0.3	-0.11	-0.19	-0.01	-0.01	-0.13	0.03
	X8_9	0.76	0.61	0.72	0.72	0.72	0.64	0.7	0.68	0.49	0.72	0.59	0.97	1	-0.21	-0.35	0.03	-0.08	-0.05	-0.08	-0.21	-0.09	-0.08	-0.29	-0.16	-0.09	-0.18	-0.25	-0.24	-0.27	-0.14	-0.16	-0.06	-0.05	-0.05	-0.04	-0.31	-0.33	-0.16	-0.12	0.01	-0.01	-0.16	0.02
	X9_10	0.84	0.76	0.79	0.78	0.84	0.72	0.82	0.8	0.6	0.84	0.91	0.56	0.55	1	-0.04	-0.07	0.05	0.02	-0.12	-0.11	-0.38	-0.3	0.06	-0.09	-0.01	-0.02	0.01	0.03	0.01	0.03	0.04	-0.03	-0.01	-0.01	-0.03	0.1	0.01	0.73	0.76	0.06	0.07	-0.34	-0.26
	X10_11	0.99	0.87	0.94	0.92	0.99	0.88	0.97	0.95	0.67	0.99	0.84	0.71	0.71	0.83	1	-0.19	0.13	-0.17	-0.18	-0.06	-0.38	-0.35	0.21	0.06	0.06	-0.08	0.01	-0.08	0.03	-0.04	-0.05	-0.01	-0.04	-0.04	0.03	0.57	0.94	0.01	-0.1	-0.13	0	-0.2	-0.32
	X11_12	0.81	0.73	0.79	0.76	0.8	0.75	0.78	0.77	0.63	0.78	0.67	0.62	0.62	0.66	0.78	1	-0.29	0.09	-0.04	-0.05	0.05	0.13	-0.06	-0.04	-0.01	-0.1	-0.06	0.01	0.06	0.06	0.22	0.09	0.01	0.15	0.08	-0.12	-0.18	-0.02	-0.04	0.06	0.01	0.05	0
	X12_13	0.73	0.62	0.69	0.68	0.74	0.65	0.72	0.71	0.47	0.73	0.62	0.5	0.51	0.63	0.73	0.47	1	-0.29	0.02	0.06	-0.13	-0.15	0.15	0.08	0.16	0.06	0.16	-0.12	0.03	-0.12	0.07	-0.01	0.09	0.03	0.08	0.14	0.14	0.01	0.05	0.01	0.08	-0.05	-0.12
	X13_14	0.96	0.86	0.92	0.89	0.95	0.86	0.94	0.91	0.68	0.93	0.82	0.72	0.72	0.81	0.93	0.79	0.64	1	-0.29	-0.02	-0.1	-0.04	-0.03	0.09	-0.08	-0.29	-0.17	0.63	0.02	0.31	0.24	0.03	0.02	0.04	-0.02	-0.26	-0.15	0.06	0.04	0.14	-0.08	-0.01	-0.21
	X14_15	0.95	0.87	0.91	0.89	0.94	0.88	0.92	0.89	0.65	0.93	0.8	0.71	0.7	0.78	0.92	0.75	0.7	0.87	1	-0.11	0.38	0.14	-0.05	-0.02	-0.06	0.44	0.56	0.16	0.02	-0.02	-0.05	0.05	0.05	0.04	0.07	-0.16	-0.15	-0.06	-0.07	0.01	0	0.36	0.64
	X15_16	0.85	0.76	0.79	0.77	0.86	0.83	0.83	0.79	0.64	0.83	0.69	0.58	0.57	0.69	0.84	0.68	0.63	0.81	0.78	1	0.36	0.35	0.13	0.08	0.03	0.47	0.33	0.11	0.06	-0.11	-0.11	-0.1	-0.08	-0.09	-0.13	-0.23	-0.07	-0.09	-0.09	0	0.05	0.36	0.08
	X1_G	0.92	0.84	0.88	0.86	0.92	0.96	0.89	0.86	0.65	0.88	0.73	0.69	0.68	0.7	0.89	0.76	0.64	0.87	0.92	0.85	1	0.82	-0.18	0.15	-0.18	0.28	0.01	-0.2	-0.03	-0.22	-0.29	-0.1	-0.13	-0.15	-0.15	-0.53	-0.4	-0.28	-0.28	-0.01	0.04	0.83	0.77
	C_D	0.8	0.74	0.77	0.73	0.79	0.9	0.76	0.75	0.55	0.75	0.59	0.59	0.58	0.58	0.75	0.7	0.52	0.76	0.77	0.79	0.92	1	-0.15	0.07	-0.17	0.19	-0.12	-0.25	0.03	-0.19	-0.25	-0.08	-0.12	-0.14	-0.15	-0.44	-0.37	-0.26	-0.26	-0.05	0.02	0.61	0.58
	E_F	0.97	0.85	0.93	0.91	0.98	0.88	0.96	0.94	0.67	0.97	0.82	0.69	0.69	0.83	0.97	0.78	0.73	0.93	0.91	0.84	0.88	0.75	1	0.3	0.26	0.05	0.21	0.17	0.21	0.15	0.21	0.09	0.09	0.09	0.14	0.19	0.24	0.01	0.12	0.13	0.13	-0.07	-0.21
	X14_B	0.95	0.83	0.91	0.89	0.96	0.88	0.94	0.91	0.69	0.94	0.79	0.69	0.69	0.79	0.94	0.77	0.71	0.92	0.9	0.83	0.89	0.77	0.95	1	0.21	0	-0.02	0.05	0.07	0.04	0.08	0.03	0.05	0.06	0.04	-0.03	0.08	-0.12	0.01	0.08	0.09	0.22	0.07
	X3_A	0.94	0.8	0.88	0.88	0.94	0.85	0.92	0.93	0.66	0.93	0.77	0.69	0.69	0.78	0.93	0.76	0.72	0.88	0.88	0.8	0.84	0.71	0.93	0.92	1	-0.06	0.09	0.07	0.03	0.08	0.17	0.01	0	0	0.02	0.01	0.1	-0.1	0.04	0.06	0.04	-0.06	-0.24
	X2_15	0.93	0.86	0.9	0.87	0.94	0.91	0.9	0.87	0.67	0.92	0.79	0.67	0.67	0.78	0.92	0.73	0.69	0.86	0.93	0.89	0.9	0.79	0.91	0.89	0.86	1	0.62	0.07	0.29	0.08	0.02	0.18	0.17	0.15	0.15	-0.05	-0.09	0.03	-0.09	-0.07	0.05	0.16	0.5
	X2_14	0.98	0.89	0.94	0.92	0.98	0.89	0.96	0.93	0.69	0.97	0.83	0.71	0.7	0.82	0.96	0.79	0.73	0.92	0.96	0.87	0.9	0.77	0.96	0.93	0.92	0.96	1	0.53	0.47	0.34	0.33	0.34	0.35	0.34	0.35	0.05	0.07	0.06	0.04	0.13	0.11	0.18	0.12
	X2_13	0.99	0.89	0.95	0.93	0.99	0.89	0.98	0.94	0.7	0.97	0.84	0.73	0.73	0.83	0.97	0.8	0.7	0.97	0.94	0.85	0.9	0.77	0.97	0.95	0.93	0.93	0.98	1	0.25	0.62	0.55	0.34	0.35	0.36	0.3	-0.11	-0.02	0.1	0.06	0.2	-0.01	0.05	-0.17
	X3_14	0.98	0.88	0.96	0.92	0.98	0.91	0.96	0.94	0.7	0.97	0.82	0.7	0.7	0.82	0.96	0.8	0.71	0.94	0.92	0.84	0.9	0.79	0.96	0.94	0.92	0.93	0.97	0.97	1	0.68	0.61	0.75	0.71	0.69	0.71	0.19	0.08	0.09	0.06	0.18	0.19	-0.02	-0.01
	X3_13	0.98	0.89	0.97	0.93	0.98	0.9	0.96	0.95	0.7	0.97	0.84	0.73	0.72	0.83	0.97	0.8	0.7	0.96	0.93	0.83	0.89	0.77	0.96	0.94	0.92	0.92	0.97	0.99	0.99	1	0.9	0.84	0.8	0.78	0.75	0.14	0.02	0.13	0.06	0.21	0.1	-0.15	-0.15
	X3_11	0.99	0.88	0.97	0.93	0.99	0.9	0.96	0.96	0.71	0.98	0.84	0.73	0.73	0.83	0.97	0.82	0.72	0.96	0.93	0.84	0.9	0.77	0.97	0.95	0.93	0.92	0.98	0.99	0.99	1	1	0.73	0.76	0.8	0.76	0.19	0.01	0.12	0.09	0.23	0.14	-0.18	-0.25
	X4_13	0.97	0.88	0.97	0.93	0.97	0.89	0.95	0.93	0.7	0.96	0.82	0.72	0.72	0.81	0.96	0.8	0.7	0.93	0.92	0.82	0.89	0.76	0.95	0.93	0.91	0.92	0.97	0.97	0.99	0.99	0.99	1	0.95	0.92	0.89	0.21	0.06	0.11	0.02	0.22	0.16	-0.09	0.01
	X4_12	0.97	0.88	0.97	0.93	0.97	0.89	0.95	0.93	0.71	0.97	0.82	0.73	0.73	0.82	0.96	0.79	0.72	0.93	0.92	0.82	0.89	0.76	0.95	0.93	0.91	0.92	0.97	0.98	0.99	0.99	0.99	1	1	0.96	0.9	0.24	0.04	0.12	0.05	0.26	0.17	-0.09	-0.04
	X4_11	0.98	0.88	0.97	0.93	0.97	0.89	0.96	0.93	0.72	0.97	0.83	0.73	0.73	0.82	0.96	0.81	0.71	0.94	0.92	0.83	0.89	0.76	0.95	0.93	0.91	0.92	0.97	0.98	0.99	0.99	0.99	1	1	1	0.92	0.25	0.03	0.14	0.05	0.25	0.19	-0.11	-0.05
	X5_11	0.97	0.88	0.97	0.93	0.97	0.89	0.95	0.93	0.68	0.97	0.82	0.73	0.73	0.81	0.96	0.8	0.72	0.93	0.93	0.82	0.89	0.76	0.95	0.93	0.91	0.92	0.97	0.97	0.99	0.99	0.99	0.99	1	1	1	0.29	0.11	0.12	0.03	0.23	0.21	-0.13	-0.05
	X5_10	0.99	0.87	0.95	0.93	0.99	0.89	0.96	0.95	0.69	1	0.84	0.72	0.72	0.84	0.99	0.79	0.73	0.93	0.93	0.83	0.89	0.75	0.97	0.94	0.93	0.92	0.97	0.98	0.97	0.98	0.98	0.97	0.97	0.97	0.97	1	0.54	0.1	0.06	0	0.07	-0.45	-0.36
	X11_6	0.99	0.87	0.94	0.92	0.99	0.89	0.97	0.95	0.68	0.99	0.83	0.72	0.71	0.83	1	0.78	0.73	0.94	0.93	0.84	0.89	0.76	0.97	0.95	0.93	0.92	0.97	0.98	0.97	0.97	0.98	0.96	0.96	0.96	0.97	0.99	1	-0.05	0.04	0.01	0.08	-0.18	-0.34
	X6_9	0.92	0.83	0.88	0.86	0.92	0.81	0.89	0.87	0.65	0.91	0.95	0.65	0.64	0.93	0.9	0.73	0.67	0.88	0.86	0.77	0.81	0.67	0.89	0.86	0.84	0.86	0.9	0.91	0.9	0.91	0.91	0.9	0.9	0.91	0.9	0.91	0.9	1	0.53	0.21	0.32	-0.26	-0.14
	X7_10	0.91	0.81	0.86	0.85	0.91	0.8	0.89	0.86	0.65	0.91	0.92	0.63	0.65	0.94	0.89	0.73	0.68	0.88	0.85	0.76	0.8	0.66	0.9	0.87	0.86	0.84	0.89	0.9	0.89	0.9	0.9	0.88	0.89	0.89	0.89	0.9	0.9	0.92	1	0.43	0.27	-0.19	-0.24
	X6_10	0.9	0.8	0.87	0.86	0.9	0.81	0.88	0.86	0.65	0.89	0.78	0.68	0.68	0.77	0.88	0.74	0.66	0.88	0.85	0.76	0.82	0.7	0.88	0.87	0.85	0.82	0.89	0.9	0.9	0.9	0.91	0.9	0.9	0.9	0.9	0.89	0.89	0.86	0.9	1	0.31	0.11	-0.07
	X7_9	0.91	0.8	0.88	0.87	0.91	0.84	0.88	0.87	0.64	0.9	0.77	0.68	0.68	0.78	0.89	0.74	0.68	0.86	0.85	0.79	0.84	0.73	0.89	0.88	0.85	0.85	0.89	0.9	0.9	0.9	0.91	0.9	0.9	0.9	0.9	0.9	0.9	0.89	0.87	0.87	1	0.12	0.02
	X2_G	0.92	0.83	0.88	0.86	0.92	0.91	0.91	0.87	0.66	0.89	0.73	0.67	0.66	0.71	0.9	0.76	0.66	0.88	0.92	0.86	0.97	0.88	0.89	0.91	0.85	0.89	0.92	0.92	0.9	0.9	0.9	0.89	0.89	0.89	0.89	0.89	0.9	0.81	0.82	0.85	0.86	1	0.52
	X15_G	0.91	0.83	0.88	0.85	0.9	0.91	0.87	0.84	0.64	0.87	0.74	0.71	0.7	0.71	0.88	0.73	0.63	0.84	0.95	0.78	0.96	0.86	0.86	0.87	0.81	0.93	0.9	0.89	0.88	0.88	0.88	0.88	0.88	0.88	0.88	0.88	0.88	0.81	0.79	0.8	0.83	0.92	1
